# Supplementary material
Source: PubMed Central journal article supplement (PMC3713791)

## Supplemental Material

**Supplemental Table 1: Replicated SNPs in the QRS GWAS analysis.** Reported betas and p-values for eMERGE analysis are adjusted for sex, and all betas for CHARGE and eMERGE analyses are for the coded allele.

| CHR | SNP        | Location  | eMERGE QRS   |                        |             |          | CHARGE QRS   |                        |             |          |              |
|-----|------------|-----------|--------------|------------------------|-------------|----------|--------------|------------------------|-------------|----------|--------------|
|     |            |           | Coded Allele | Coded Allele Frequency | BETA (msec) | p-value  | Coded Allele | Coded Allele Frequency | BETA (msec) | p-value  | Nearest Gene |
| 3   | rs1805126* | 38567410  | T**          | 0.665                  | -1.002      | 1.45E-08 | A            | 0.655                  | -0.6568     | 2.52E-20 | SCN5A*       |
| 3   | rs9832895  | 38636537  | C            | 0.518                  | 0.895       | 1.18E-07 | C            | 0.497                  | 0.6576      | 8.68E-18 | SCN5A        |
| 3   | rs6771881  | 38553268  | A            | 0.756                  | -1.003      | 2.23E-07 | A            | 0.745                  | -0.7659     | 2.54E-22 | EXOG         |
| 3   | rs12053903 | 38568397  | C            | 0.329                  | 0.881       | 7.54E-07 | C            | 0.330                  | 0.646       | 1.87E-19 | SCN5A        |
| 3   | rs7374138  | 38580736  | C            | 0.737                  | 0.912       | 1.49E-06 | C            | 0.718                  | 0.5041      | 5.59E-10 | SCN5A        |
| 3   | rs11129801 | 38725379  | A            | 0.294                  | -0.877      | 1.82E-06 | A            | 0.301                  | -0.6296     | 2.60E-17 | SCN10A       |
| 3   | rs6800541  | 38749836  | C            | 0.409                  | 0.803       | 1.97E-06 | C            | 0.398                  | 0.7394      | 1.88E-27 | SCN10A       |
| 3   | rs12636358 | 38430905  | A            | 0.047                  | 1.867       | 2.30E-06 | A            | 0.070                  | 1.185       | 2.46E-12 | XYLBI        |
| 3   | rs7430439  | 38778643  | A            | 0.597                  | -0.794      | 4.03E-06 | A            | 0.588                  | -0.5516     | 8.32E-16 | SCN10A       |
| 3   | rs6798015  | 38773840  | C            | 0.374                  | 0.793       | 4.25E-06 | C            | 0.370                  | 0.7187      | 5.88E-24 | SCN10A       |
| 3   | rs4130467  | 38586708  | G**          | 0.279                  | 0.846       | 5.88E-06 | C            | 0.289                  | 0.5274      | 5.98E-12 | SCN5A        |
| 3   | rs6795970* | 38741679  | A            | 0.401                  | 0.765       | 6.60E-06 | A            | 0.396                  | 0.7476      | 5.08E-27 | SCN10A*      |
| 3   | rs7374540  | 38609146  | A            | 0.609                  | -0.758      | 1.04E-05 | A            | 0.598                  | -0.5246     | 7.67E-14 | SCN5A        |
| 3   | rs6797133  | 38631037  | A            | 0.394                  | -0.750      | 1.14E-05 | A            | 0.395                  | -0.667      | 2.61E-21 | SCN5A        |
| 3   | rs9861242  | 38584338  | A            | 0.250                  | 0.848       | 1.20E-05 | A            | 0.262                  | 0.5273      | 7.43E-11 | SCN5A        |
| 3   | rs7373102  | 38655632  | C            | 0.496                  | 0.680       | 1.65E-05 | C            | 0.494                  | 0.4128      | 1.10E-08 | SCN5A        |
| 6   | rs6906287* | 119069433 | C            | 0.454                  | 0.717       | 2.26E-05 | C            | 0.451                  | 0.5383      | 5.56E-16 | C6orf204*    |
| 6   | rs11970286 | 118787067 | C            | 0.549                  | -0.715      | 2.33E-05 | C            | 0.534                  | -0.5502     | 4.89E-16 | SLC35F1      |
| 6   | rs4307206  | 118920013 | A            | 0.451                  | 0.712       | 2.59E-05 | A            | 0.450                  | 0.5399      | 4.56E-16 | C6orf204     |
| 6   | rs1321313* | 36726799  | G**          | 0.760                  | -0.793      | 6.13E-05 | C            | 0.742                  | -0.8129     | 4.60E-25 | CDKN1A*      |
| 3   | rs7430477  | 38740494  | C            | 0.530                  | 0.661       | 8.18E-05 | C            | 0.524                  | 0.6061      | 2.72E-19 | SCN10A       |
| 3   | rs6599257  | 38779592  | C            | 0.313                  | 0.705       | 9.58E-05 | C            | 0.306                  | 0.5508      | 2.23E-14 | SCN10A       |
| 1   | rs2207790* | 61670555  | T**          | 0.482                  | -0.622      | 2.07E-04 | A            | 0.461                  | -0.5956     | 6.31E-18 | NFIA*        |

\*The genome-wide association analysis results for these variants (best or near-best association at each locus/gene in replication analysis) are shown in Table 3.

\*\*This SNP was coded on the opposite strand from that in the CHARGE study. Therefore, while the allele is not identical, the direction of effect is the same.

**Supplemental Figure 1:** LocusZoom plot of the region in chromosome 3 in which most of the replicated associations (18/23) were identified. All variants with  $p < 10^{-4}$  in the eMERGE data set were replicated at  $p < 5 \times 10^{-8}$  in the CHARGE data set.

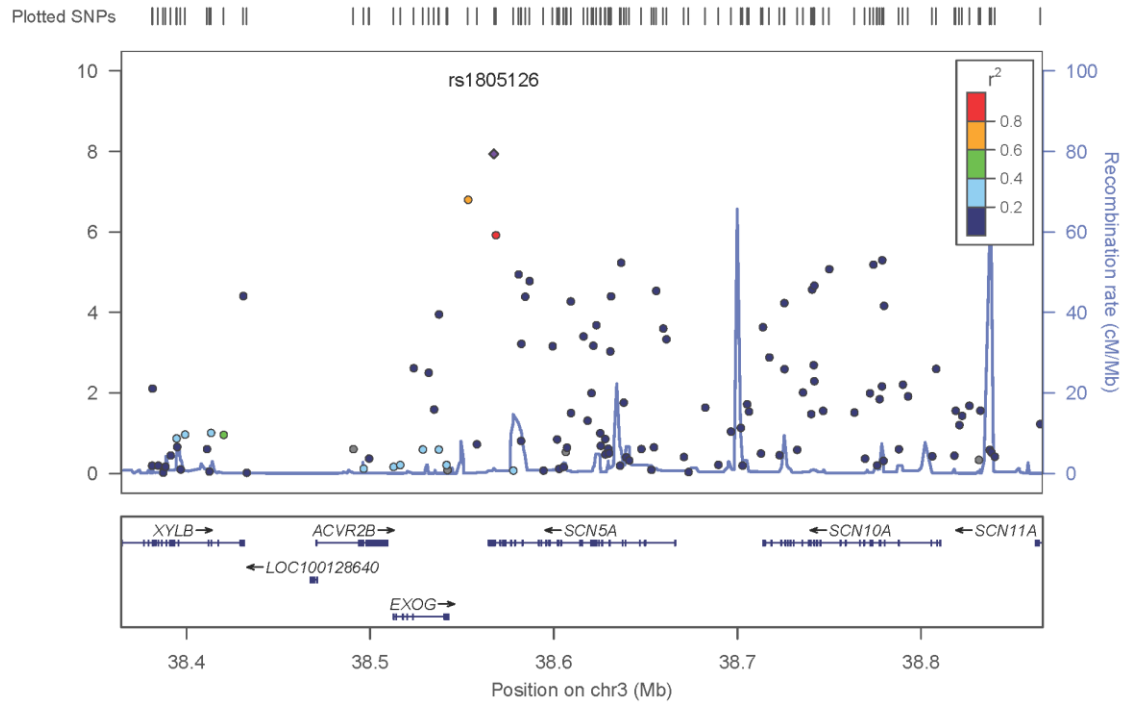

**Supplemental Table 2: PheWAS associations for replicated SNPs (N=23).** Data for all associations with P<0.01 are shown. ICD9 codes for given associations can be downloaded from <http://knowledgemap.mc.vanderbilt.edu/research/content/phewas>.

| SNP        | Chr | Nearest gene | Disease association                               | cases | odds ratio | P-value  |
|------------|-----|--------------|---------------------------------------------------|-------|------------|----------|
| rs11129801 | 3   | SCN10A       | Epilepsy and recurrent seizures                   | 181   | 0.71       | 6.23E-03 |
| rs11129801 | 3   | SCN10A       | Malignant neoplasm of uterus                      | 103   | 1.49       | 6.31E-03 |
| rs11129801 | 3   | SCN10A       | Migraine                                          | 420   | 0.81       | 9.81E-03 |
| rs6599257  | 3   | SCN10A       | Atrial fibrillation and flutter                   | 1758  | 0.84       | 6.53E-04 |
| rs6599257  | 3   | SCN10A       | Drug dependence                                   | 71    | 1.68       | 2.88E-03 |
| rs6599257  | 3   | SCN10A       | Cardiac arrhythmias                               | 3075  | 0.89       | 3.03E-03 |
| rs6599257  | 3   | SCN10A       | Lupus erythematosus                               | 93    | 0.59       | 4.31E-03 |
| rs6599257  | 3   | SCN10A       | Cholecystitis                                     | 121   | 0.65       | 4.77E-03 |
| rs6599257  | 3   | SCN10A       | Migraine                                          | 420   | 1.23       | 5.78E-03 |
| rs6795970  | 3   | SCN10A       | Cardiac arrhythmias                               | 3075  | 0.88       | 7.21E-04 |
| rs6795970  | 3   | SCN10A       | Atrial fibrillation and flutter                   | 1758  | 0.85       | 8.45E-04 |
| rs6795970  | 3   | SCN10A       | Arterial embolism and thrombosis                  | 150   | 0.69       | 3.20E-03 |
| rs6795970  | 3   | SCN10A       | Cholecystitis                                     | 121   | 0.66       | 3.44E-03 |
| rs6795970  | 3   | SCN10A       | Convulsions                                       | 311   | 1.25       | 7.01E-03 |
| rs6795970  | 3   | SCN10A       | Aphasia                                           | 69    | 0.60       | 7.25E-03 |
| rs6798015  | 3   | SCN10A       | Cholecystitis                                     | 121   | 0.56       | 1.32E-04 |
| rs6798015  | 3   | SCN10A       | Arterial embolism and thrombosis                  | 150   | 0.67       | 1.73E-03 |
| rs6798015  | 3   | SCN10A       | Atrial fibrillation and flutter                   | 1758  | 0.86       | 2.39E-03 |
| rs6798015  | 3   | SCN10A       | Genital prolapse                                  | 511   | 0.82       | 8.87E-03 |
| rs6800541  | 3   | SCN10A       | Cardiac arrhythmias                               | 3075  | 0.89       | 1.90E-03 |
| rs6800541  | 3   | SCN10A       | Atrial fibrillation and flutter                   | 1758  | 0.86       | 2.15E-03 |
| rs6800541  | 3   | SCN10A       | Cholecystitis                                     | 121   | 0.66       | 2.64E-03 |
| rs6800541  | 3   | SCN10A       | Arterial embolism and thrombosis                  | 150   | 0.69       | 3.05E-03 |
| rs6800541  | 3   | SCN10A       | Aphasia                                           | 69    | 0.61       | 8.15E-03 |
| rs6800541  | 3   | SCN10A       | Gingival and periodontal diseases                 | 229   | 0.77       | 9.66E-03 |
| rs7430439  | 3   | SCN10A       | Intestinal malabsorption                          | 156   | 1.42       | 2.34E-03 |
| rs7430439  | 3   | SCN10A       | Allergic rhinitis                                 | 865   | 1.16       | 4.83E-03 |
| rs7430439  | 3   | SCN10A       | Disturbance of skin sensation                     | 664   | 0.85       | 7.85E-03 |
| rs7430439  | 3   | SCN10A       | First degree AV block                             | 181   | 1.34       | 9.09E-03 |
| rs7430439  | 3   | SCN10A       | Cholecystitis                                     | 121   | 0.70       | 9.44E-03 |
| rs7430477  | 3   | SCN10A       | Cholecystitis                                     | 121   | 1.71       | 5.85E-05 |
| rs7430477  | 3   | SCN10A       | Epilepsy and recurrent seizures                   | 181   | 0.72       | 2.90E-03 |
| rs7430477  | 3   | SCN10A       | Tinnitus                                          | 159   | 1.39       | 4.46E-03 |
| rs7430477  | 3   | SCN10A       | Gingival and periodontal diseases                 | 229   | 1.30       | 6.12E-03 |
| rs7430477  | 3   | SCN10A       | Convulsions                                       | 311   | 0.80       | 7.36E-03 |
| rs7430477  | 3   | SCN10A       | Migraine                                          | 420   | 0.83       | 7.87E-03 |
| rs7430477  | 3   | SCN10A       | Inflammatory disease of cervix, vagina, and vulva | 266   | 0.79       | 8.21E-03 |
|            |     |              |                                                   |       |            |          |
| rs11970286 | 6   | SLC35F1      | Colorectal cancer                                 | 316   | 0.77       | 1.37E-03 |
| rs11970286 | 6   | SLC35F1      | Nasal polyps                                      | 127   | 1.48       | 2.32E-03 |
| rs11970286 | 6   | SLC35F1      | Malignant neoplasm of colon                       | 226   | 0.75       | 3.23E-03 |
| rs11970286 | 6   | SLC35F1      | Personal history of malignant                     | 130   | 0.69       | 3.80E-03 |

|            |   |                |                                                                 |      |      |          |
|------------|---|----------------|-----------------------------------------------------------------|------|------|----------|
|            |   |                | neoplasm of colon                                               |      |      |          |
| rs11970286 | 6 | <i>SLC35F1</i> | Personal history of malignant melanoma of skin                  | 151  | 1.37 | 7.37E-03 |
| rs11970286 | 6 | <i>SLC35F1</i> | Hyperplasia of prostate                                         | 1615 | 0.87 | 9.66E-03 |
| rs12053903 | 3 | <i>SCN5A</i>   | Chronic kidney disease                                          | 1212 | 0.85 | 9.16E-04 |
| rs12053903 | 3 | <i>SCN5A</i>   | Atherosclerosis                                                 | 1511 | 0.87 | 1.60E-03 |
| rs12053903 | 3 | <i>SCN5A</i>   | Cardiac arrhythmias                                             | 3075 | 0.89 | 2.80E-03 |
| rs12053903 | 3 | <i>SCN5A</i>   | Other peripheral vascular disease                               | 1228 | 0.88 | 5.84E-03 |
| rs12053903 | 3 | <i>SCN5A</i>   | Disorders resulting from impaired renal function                | 173  | 0.71 | 5.92E-03 |
| rs12053903 | 3 | <i>SCN5A</i>   | Osteomyelitis, periostitis, and other infections involving bone | 192  | 0.73 | 7.56E-03 |
| rs12053903 | 3 | <i>SCN5A</i>   | Other paralytic syndromes                                       | 65   | 1.60 | 8.78E-03 |
| rs12053903 | 3 | <i>SCN5A</i>   | Thyrototoxicosis with or without goiter                         | 189  | 0.74 | 9.64E-03 |
| rs12053903 | 3 | <i>SCN5A</i>   | Fracture of other and unspecified parts of femur                | 85   | 0.62 | 9.96E-03 |
| rs1805126  | 3 | <i>SCN5A</i>   | Cardiac arrhythmias                                             | 3075 | 0.88 | 1.10E-03 |
| rs1805126  | 3 | <i>SCN5A</i>   | Diseases of upper respiratory tract                             | 509  | 0.81 | 3.83E-03 |
| rs1805126  | 3 | <i>SCN5A</i>   | Hyperplasia of prostate                                         | 1615 | 0.85 | 5.54E-03 |
| rs1805126  | 3 | <i>SCN5A</i>   | Chronic kidney disease                                          | 1212 | 0.88 | 6.02E-03 |
| rs1805126  | 3 | <i>SCN5A</i>   | Personal history of malignant melanoma of skin                  | 151  | 0.70 | 8.18E-03 |
| rs1805126  | 3 | <i>SCN5A</i>   | Dermatophytosis                                                 | 1229 | 0.88 | 8.77E-03 |
| rs4130467  | 3 | <i>SCN5A</i>   | Late effects of musculoskeletal and connective tissue injuries  | 81   | 1.67 | 1.55E-03 |
| rs4130467  | 3 | <i>SCN5A</i>   | Hyperplasia of prostate                                         | 1615 | 0.85 | 6.97E-03 |
| rs4130467  | 3 | <i>SCN5A</i>   | Systemic lupus erythematosus                                    | 81   | 1.56 | 7.07E-03 |
| rs7373102  | 3 | <i>SCN5A</i>   | Postinflammatory pulmonary fibrosis                             | 173  | 1.50 | 1.31E-04 |
| rs7373102  | 3 | <i>SCN5A</i>   | Irritable Bowel Syndrome                                        | 498  | 0.81 | 1.54E-03 |
| rs7373102  | 3 | <i>SCN5A</i>   | Diseases of white blood cells                                   | 219  | 1.31 | 3.98E-03 |
| rs7373102  | 3 | <i>SCN5A</i>   | Abnormal glucose                                                | 837  | 0.87 | 4.46E-03 |
| rs7373102  | 3 | <i>SCN5A</i>   | Functional digestive disorders                                  | 553  | 0.84 | 4.95E-03 |
| rs7373102  | 3 | <i>SCN5A</i>   | Elevated blood pressure                                         | 829  | 0.88 | 7.67E-03 |
| rs7373102  | 3 | <i>SCN5A</i>   | Abnormal cardiovascular function test                           | 838  | 0.88 | 7.87E-03 |
| rs7373102  | 3 | <i>SCN5A</i>   | Anxiety, phobic and dissociative disorders                      | 412  | 0.84 | 9.09E-03 |
| rs7374138  | 3 | <i>SCN5A</i>   | Malignant neoplasm of female breast                             | 645  | 1.22 | 2.10E-03 |
| rs7374138  | 3 | <i>SCN5A</i>   | Chronic pharyngitis and nasopharyngitis                         | 462  | 1.24 | 3.14E-03 |
| rs7374540  | 3 | <i>SCN5A</i>   | Dermatophytosis                                                 | 1229 | 0.87 | 2.05E-03 |
| rs7374540  | 3 | <i>SCN5A</i>   | Spondylosis and allied disorders                                | 1244 | 0.86 | 2.54E-03 |
| rs7374540  | 3 | <i>SCN5A</i>   | Fracture of patella                                             | 65   | 0.56 | 3.58E-03 |
| rs7374540  | 3 | <i>SCN5A</i>   | Deviated nasal septum                                           | 275  | 0.77 | 3.86E-03 |
| rs7374540  | 3 | <i>SCN5A</i>   | Emphysema                                                       | 138  | 0.69 | 5.01E-03 |

|            |   |          |                                                                                        |      |      |          |
|------------|---|----------|----------------------------------------------------------------------------------------|------|------|----------|
| rs7374540  | 3 | SCN5A    | Osteopenia                                                                             | 2161 | 0.89 | 5.77E-03 |
| rs7374540  | 3 | SCN5A    | Candidiasis                                                                            | 201  | 0.75 | 6.29E-03 |
| rs7374540  | 3 | SCN5A    | Sprains and strains                                                                    | 2928 | 0.91 | 6.34E-03 |
| rs7374540  | 3 | SCN5A    | Late effects of musculoskeletal and connective tissue injuries                         | 81   | 1.54 | 6.47E-03 |
| rs7374540  | 3 | SCN5A    | Urinary tract infection                                                                | 2094 | 0.89 | 8.31E-03 |
| rs7374540  | 3 | SCN5A    | Polymyalgia Rheumatica                                                                 | 214  | 0.75 | 9.38E-03 |
| rs9832895  | 3 | SCN5A    | Acute reaction to stress                                                               | 99   | 1.56 | 2.14E-03 |
| rs9832895  | 3 | SCN5A    | Mitral valve disorders                                                                 | 551  | 1.20 | 5.79E-03 |
| rs9832895  | 3 | SCN5A    | Debility                                                                               | 309  | 1.25 | 6.76E-03 |
| rs9832895  | 3 | SCN5A    | Disorders of tooth development and eruption                                            | 55   | 1.69 | 7.48E-03 |
| rs9832895  | 3 | SCN5A    | Peptic ulcers                                                                          | 427  | 1.20 | 9.29E-03 |
| rs9861242  | 3 | SCN5A    | Late effects of musculoskeletal and connective tissue injuries                         | 81   | 1.66 | 2.18E-03 |
| rs9861242  | 3 | SCN5A    | Deficiency of B-complex components                                                     | 284  | 1.27 | 9.71E-03 |
| rs6797133  | 3 | SCN5A    | Sleep disorders                                                                        | 52   | 0.50 | 2.48E-03 |
| rs6797133  | 3 | SCN5A    | Other diseases of appendix                                                             | 59   | 0.59 | 9.88E-03 |
| rs12636358 | 3 | XYLB     | Sleep disorders                                                                        | 52   | 2.46 | 5.26E-03 |
| rs12636358 | 3 | XYLB     | Diseases of hard tissues of teeth                                                      | 209  | 1.65 | 9.73E-03 |
| rs1321313  | 6 | CDKN1A   | Anorexia                                                                               | 53   | 0.36 | 1.57E-03 |
| rs1321313  | 6 | CDKN1A   | Bacteremia                                                                             | 118  | 0.57 | 2.01E-03 |
| rs1321313  | 6 | CDKN1A   | Anal fissure and fistula                                                               | 108  | 1.55 | 3.04E-03 |
| rs1321313  | 6 | CDKN1A   | Abnormal loss of weight                                                                | 398  | 0.76 | 3.39E-03 |
| rs1321313  | 6 | CDKN1A   | Dementias                                                                              | 841  | 0.83 | 5.69E-03 |
| rs1321313  | 6 | CDKN1A   | Overweight, obesity and other hyperalimentation                                        | 2501 | 1.11 | 7.39E-03 |
| rs1321313  | 6 | CDKN1A   | Spondylosis and allied disorders                                                       | 1244 | 1.16 | 9.39E-03 |
| rs2207790  | 1 | NFIA     | Postinflammatory pulmonary fibrosis                                                    | 173  | 0.70 | 1.76E-03 |
| rs2207790  | 1 | NFIA     | Abnormal serum enzyme levels (acid phosphatase, alkaline phosphatase, amylase, lipase) | 205  | 1.37 | 1.97E-03 |
| rs2207790  | 1 | NFIA     | Multiple myeloma and immunoproliferative neoplasms                                     | 54   | 0.54 | 2.80E-03 |
| rs2207790  | 1 | NFIA     | Neutropenia and leukopenia                                                             | 238  | 0.75 | 2.81E-03 |
| rs2207790  | 1 | NFIA     | Facial nerve disorders                                                                 | 67   | 1.68 | 3.70E-03 |
| rs2207790  | 1 | NFIA     | Cardiomyopathy                                                                         | 420  | 0.80 | 4.40E-03 |
| rs2207790  | 1 | NFIA     | Pneumothorax                                                                           | 80   | 0.64 | 6.59E-03 |
| rs2207790  | 1 | NFIA     | Disorders of function of stomach                                                       | 355  | 1.23 | 7.73E-03 |
| rs2207790  | 1 | NFIA     | Prostatitis                                                                            | 150  | 0.72 | 8.85E-03 |
| rs2207790  | 1 | NFIA     | Toxic diffuse goiter                                                                   | 76   | 1.54 | 9.47E-03 |
| rs4307206  | 6 | C6orf204 | Colorectal cancer                                                                      | 316  | 0.76 | 1.01E-03 |
| rs4307206  | 6 | C6orf204 | Malignant neoplasm of colon                                                            | 226  | 0.74 | 2.76E-03 |

|           |   |                 |                                                 |      |      |          |
|-----------|---|-----------------|-------------------------------------------------|------|------|----------|
| rs4307206 | 6 | <i>C6orf204</i> | Hyperplasia of prostate                         | 1615 | 0.86 | 3.92E-03 |
| rs4307206 | 6 | <i>C6orf204</i> | Personal history of malignant neoplasm of colon | 130  | 0.69 | 4.14E-03 |
| rs4307206 | 6 | <i>C6orf204</i> | Penicillin allergy                              | 65   | 1.64 | 6.07E-03 |
| rs4307206 | 6 | <i>C6orf204</i> | Disorders of pancreatic internal secretion      | 84   | 0.65 | 7.40E-03 |
| rs4307206 | 6 | <i>C6orf204</i> | Nasal polyps                                    | 127  | 1.40 | 8.87E-03 |
| rs4307206 | 6 | <i>C6orf204</i> | Personal history of malignant melanoma of skin  | 151  | 1.36 | 9.30E-03 |
| rs6906287 | 6 | <i>C6orf204</i> | Colorectal cancer                               | 316  | 0.76 | 9.90E-04 |
| rs6906287 | 6 | <i>C6orf204</i> | Malignant neoplasm of colon                     | 226  | 0.75 | 3.03E-03 |
| rs6906287 | 6 | <i>C6orf204</i> | Penicillin allergy                              | 65   | 1.68 | 4.01E-03 |
| rs6906287 | 6 | <i>C6orf204</i> | Hyperplasia of prostate                         | 1615 | 0.86 | 4.19E-03 |
| rs6906287 | 6 | <i>C6orf204</i> | Personal history of malignant neoplasm of colon | 130  | 0.70 | 5.04E-03 |
| rs6906287 | 6 | <i>C6orf204</i> | Personal history of malignant melanoma of skin  | 151  | 1.38 | 5.68E-03 |
| rs6906287 | 6 | <i>C6orf204</i> | Disorders of pancreatic internal secretion      | 84   | 0.64 | 6.22E-03 |
| rs6906287 | 6 | <i>C6orf204</i> | Nasal polyps                                    | 127  | 1.41 | 7.15E-03 |
| rs6906287 | 6 | <i>C6orf204</i> | Prostatitis                                     | 150  | 0.72 | 8.07E-03 |
|           |   |                 |                                                 |      |      |          |
| rs6771881 | 3 | <i>EXOG</i>     | Hyperplasia of prostate                         | 1615 | 0.81 | 8.10E-04 |
| rs6771881 | 3 | <i>EXOG</i>     | Chronic liver disease                           | 254  | 1.33 | 3.55E-03 |
| rs6771881 | 3 | <i>EXOG</i>     | Cardiac arrhythmias                             | 3075 | 0.88 | 3.86E-03 |
| rs6771881 | 3 | <i>EXOG</i>     | Sexual and gender identity disorders            | 76   | 0.51 | 4.20E-03 |
| rs6771881 | 3 | <i>EXOG</i>     | Chronic kidney disease                          | 1212 | 0.86 | 5.07E-03 |
| rs6771881 | 3 | <i>EXOG</i>     | Cerebral degenerations                          | 137  | 0.63 | 5.29E-03 |
| rs6771881 | 3 | <i>EXOG</i>     | Diarrhea                                        | 880  | 0.85 | 9.06E-03 |

Supplemental Figure 2: Phenome-wide association study plot for *CDKN1A* (rs1321313).

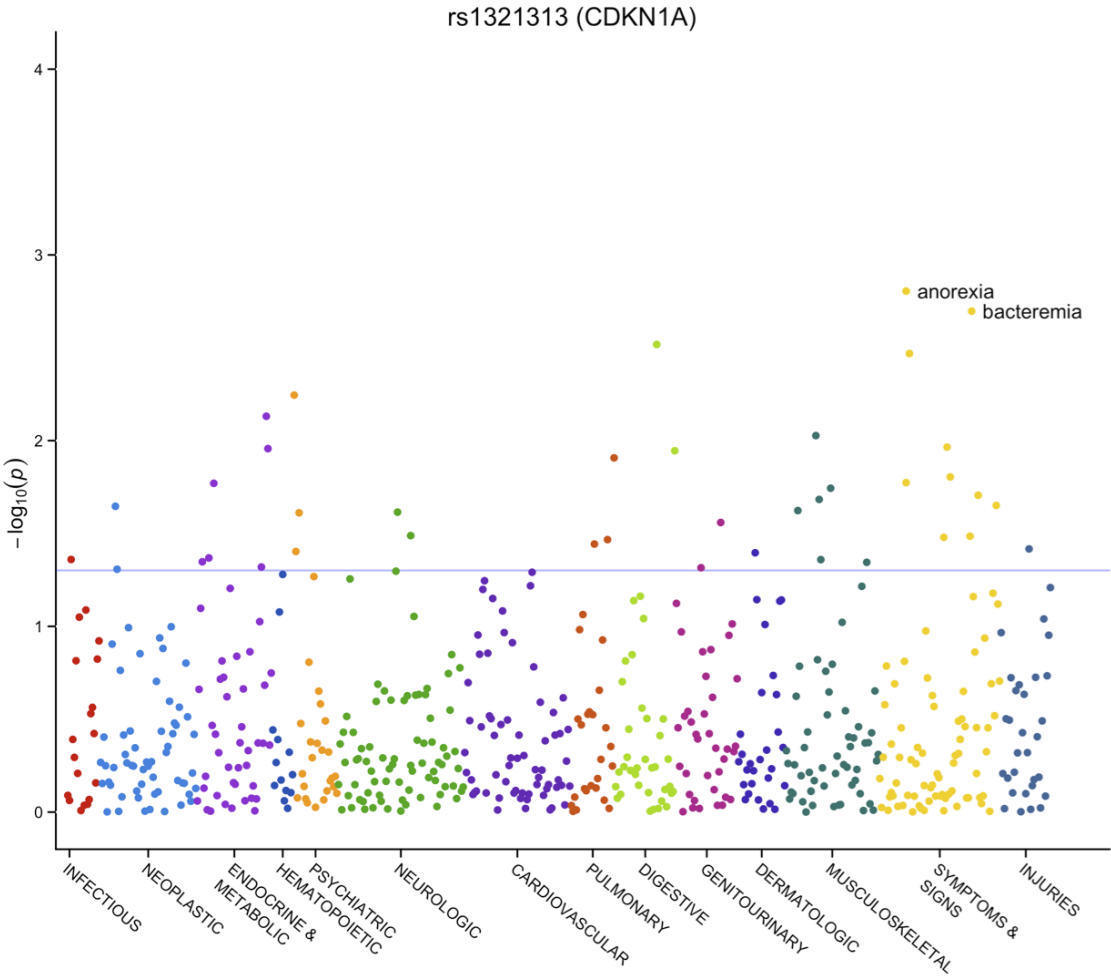

Supplemental Figure 3: Phenome-wide association study plot for *C6orf204* (rs6906287).

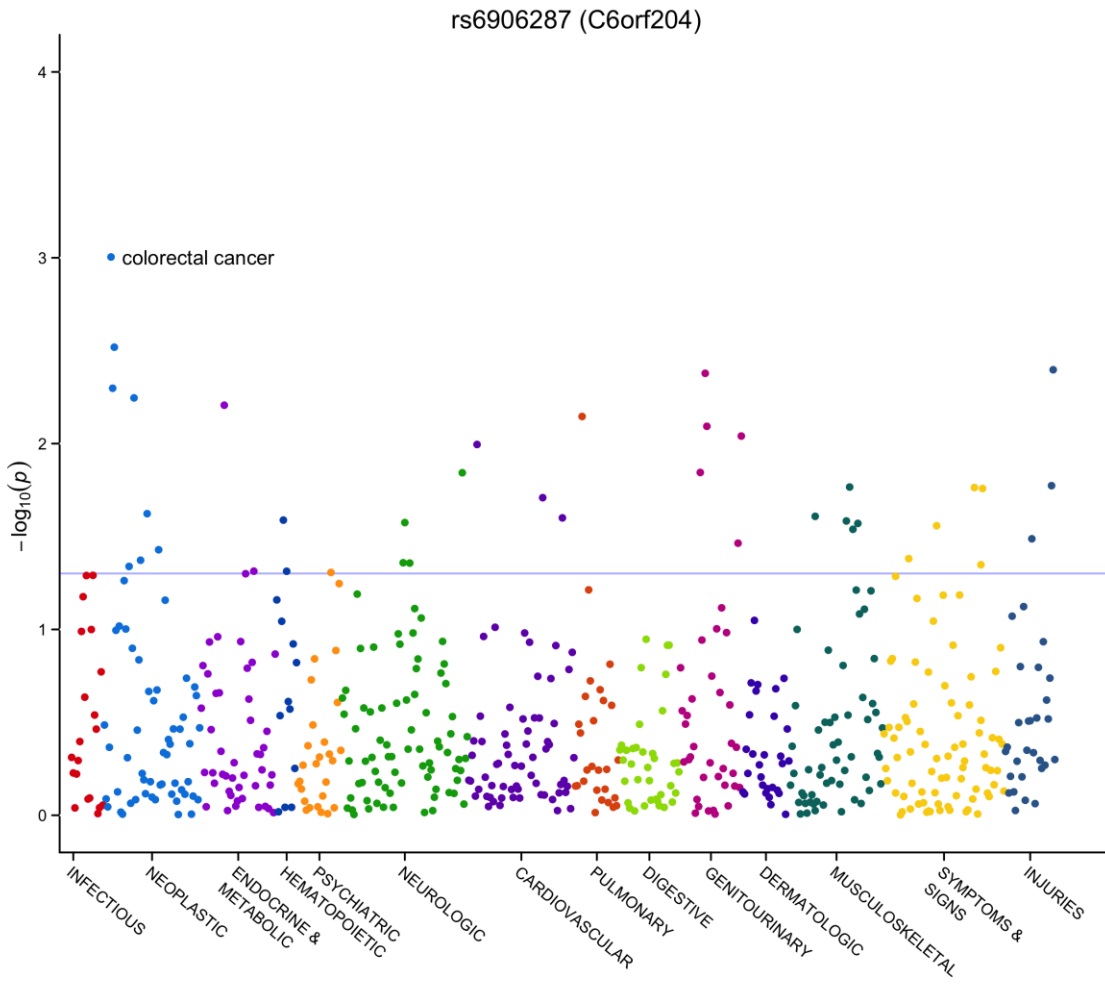



**Supplemental Figure 4: Phenome-wide association study plot for *NFIA* (rs2207790).**

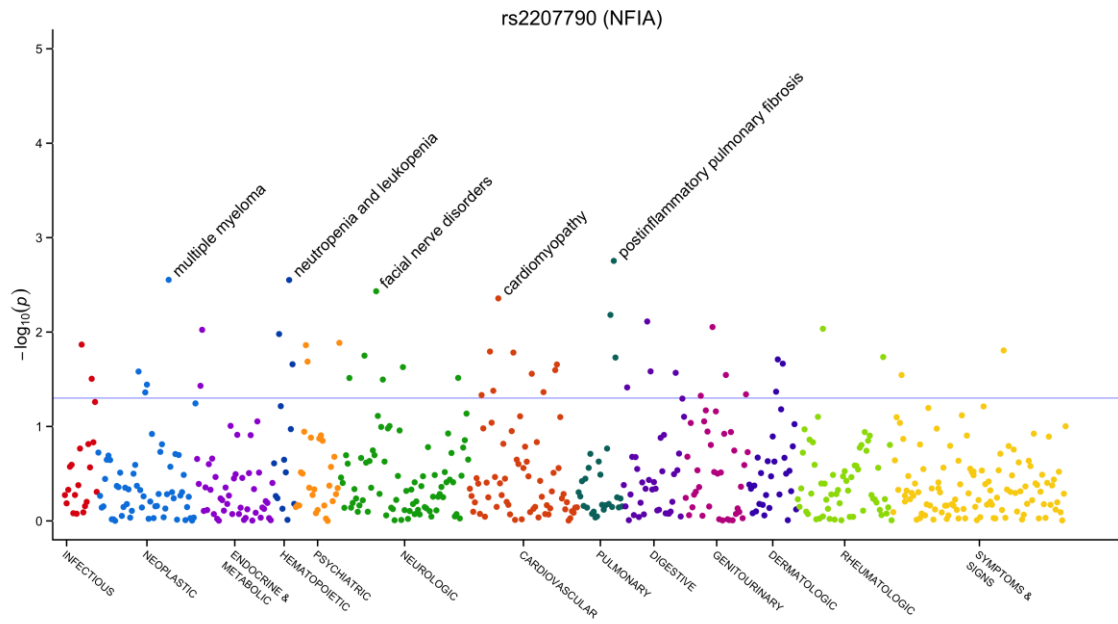

Supplement: NIHMS484529-supplement-01.pdf [file NIHMS484529-supplement-01.pdf]
